1 Validation of scRNA-seq by scRT-ddPCR using the example of *ErbB2* in MCF7  
2 cells

3

4 Tobias Lange<sup>1,2,§</sup>, Tobias Groß<sup>1,2</sup>, Ábris Jeney<sup>3</sup>, Julia Scherzinger<sup>4</sup>, Elly Sinkala<sup>4</sup>, Christoph  
5 Niemöller<sup>4</sup>, Stefan Zimmermann<sup>1</sup>, Peter Koltay<sup>1,2</sup>, Felix von Stetten<sup>1,5</sup>, Roland Zengerle<sup>1,5</sup>,  
6 Csaba Jeney<sup>1,2,§</sup>

7

8 Affiliations

9 <sup>1</sup>Laboratory for MEMS Applications, Department of Microsystems Engineering (IMTEK),  
10 University of Freiburg, Georges-Köhler-Allee 103, Freiburg 79110, Germany

11 <sup>2</sup>Actome GmbH, Georges-Köhler-Allee 103, Freiburg 79110, Germany

12 <sup>3</sup>Faculty of Medicine, University of Freiburg, Breisacher Straße 153, Freiburg 79110,  
13 Germany

14 <sup>4</sup>CYTENA GmbH, Zollhallenstraße 5, Freiburg 79106, Germany

15 <sup>5</sup>Hahn-Schickard, Georges-Köhler-Allee 103, Freiburg 79110, Germany

16 <sup>§</sup>To whom correspondence should be addressed: [csaba.jeney@actome.de](mailto:csaba.jeney@actome.de),  
17 [tobias.lange@imtek.uni-freiburg.de](mailto:tobias.lange@imtek.uni-freiburg.de)

18

19 Abbreviations

20 CI: confidence interval, cl: crude lysate, CV: coefficient of variance, DE: differential  
21 expression, DEG: differentially expressed gene, dPCR: digital PCR, FACS:  
22 fluorescence-activated cell sorting, log<sub>2</sub>FC: log<sub>2</sub> of fold change between two conditions,  
23 RT-qPCR: reverse transcription quantitative PCR, sc: single-cell, scRNA-seq: single-cell  
24 RNA sequencing, scRT-ddPCR: single-cell reverse transcription droplet digital PCR, TPM:  
25 Transcripts per kilobase million, UMAP: uniform manifold approximation and projection,

26

27 Keywords

28 Down-scaled, dPCR, scRNA-seq, scRT-ddPCR, single cells, SMART-Seq

29

30 Abstract

31 Single-cell RNA sequencing (scRNA-seq) can unmask transcriptional heterogeneity  
32 facilitating the detection of rare subpopulations at unprecedented resolution. In response to  
33 challenges related to coverage and quantity of transcriptome analysis, the lack of unbiased  
34 and absolutely quantitative validation methods hampers further improvements. Digital PCR  
35 (dPCR) represents such a method as we could show that the inherent partitioning enhances  
36 molecular detections by increasing effective mRNA concentrations. We developed a scRT-  
37 ddPCR method and validated it using two breast cancer cell lines, MCF7 and BT-474, and  
38 bulk methods. *ErbB2*, a low-abundant transcript in MCF7 cells, suffers from dropouts in  
39 scRNA-seq and thus calculated fold changes are biased. Using our scRT-ddPCR, we could  
40 improve the detection of *ErbB2* and based on the absolute counts obtained we could validate  
41 the scRNA-seq fold change. We think this workflow is a valuable addition to the single-cell  
42 transcriptomic research toolbox and could even become a new standard in fold change  
43 validation because of its reliability, ease of use and increased sensitivity.

44

## 45 1 Introduction

46 RNA-seq is the method of choice for gene expression analysis. Herein, differential expression  
47 (DE) analysis between two conditions is pivotal to answer challenging questions in research  
48 and clinical applications. In bulk RNA-seq, population heterogeneity remains covert, whereas  
49 scRNA-seq can capture delicate differences between cells [1]. The development of new  
50 platforms expresses the growing interest in scRNA-seq [2–6] and allows novel applications,  
51 such as unmasking transcriptional heterogeneity in healthy and cancerous tissues by  
52 functional clustering [7–9], discovering uncharacterized cell types [10], and identifying  
53 phylogenetic relationships between cells [11]. scRNA-seq enables researchers to understand  
54 underlying mechanisms of drug resistance development and relapse in disease treatment by  
55 the detection of rare subpopulations at unprecedented resolution [5,8,12]. However, the  
56 inherent low sample input in scRNA-seq introduces a significant amount of noise, which  
57 increases the propensity for dropouts and artificially increases cell-to-cell variability [13,14].  
58 This is especially dramatic with respect to low-abundant transcripts, which are often referred  
59 to as highly interesting but difficult to reliably analyze [15–18]. Furthermore, the tremendous  
60 variety of platforms and bioinformatics tools has not yet solidified into a consistent pipeline  
61 [13,19,20]. Additionally, the protocol impacts results, as plate-based Smart-seq2 [21,22]  
62 proved to be more sensitive, especially regarding low-abundant transcripts compared to the  
63 droplet-based Chromium system from 10X Genomics [23,24].

64 Thus, DE analysis from scRNA-seq must be independently confirmed by single-cell PCR  
65 [25]. Several scRT-qPCR workflows have been described [26–30] as well as a few  
66 scRT-ddPCR workflows [31–33]. The majority of these workflows use fluorescence-activated  
67 cell sorting (FACS) for single-cell isolation [27,28,30,31,34], while other studies use  
68 microfluidic devices [32,33], micromanipulators [26] or manual cell picking [29]. Despite its  
69 widespread use, single-cell isolation with FACS requires high sample input and the inherent  
70 shear forces can damage the cells and impair RNA integrity [34,35]. Furthermore, qPCR is  
71 less sensitive and more susceptible to inhibitors compared to dPCR [17,36], while the  
72 detection mechanism of dPCR allows absolute quantification without reference [37].  
73 Particularly, the lower sensitivity of qPCR hampers its use for challenging, single-cell mRNA  
74 quantification with a focus on low-abundant transcripts.

75 Therefore, we here propose a novel method for the validation of fold changes from scRNA-  
76 seq. Our scRT-ddPCR method combines gentle (ensuring high cell viability ~ 80 %) and  
77 highly reliable (~ 90 % single cell isolation efficiency) single cell isolation using the  
78 F.SIGHT™ single-cell dispenser (CYTENA GmbH, Freiburg) [38] and contact-free liquid  
79 handling (I.DOT, Dispendix, Stuttgart) with highly sensitive dPCR [36]. The F.SIGHT™  
80 requires minimal sample input (down to 5000 cells in 5 µl) and its image-based analysis  
81 ensures single-cell isolation and delivers an image proof of each dispensing event, which can  
82 be unambiguously assigned to the addressed well of the microplate. Through partitioning,  
83 dPCR can reliably detect single molecules and enables absolute quantification [17,32,36]. The

84 latter characteristic is key to inter-experimental comparisons as absolute counts are  
85 independent of any standard and depict the ground truth. For the validation of our scRT-  
86 ddPCR, we used two breast cancer cell lines, MCF7 and BT-474, the latter overexpresses  
87 *ErbB2* [39–41]. We found high concordance between mRNA counts from scRT-ddPCR and  
88 bulk RT-ddPCR methods. Interestingly, *ErbB2* log<sub>2</sub>FCs were significantly different between  
89 scRNA-seq and scRT-ddPCR. We assume that the inherent partitioning of dPCR increases  
90 sensitivity and resolution, and thus allows us to confirm or reject fold changes from  
91 scRNA-seq.

92

93 2 Materials and methods

94 2.1 Cells and cell culture

95 MCF7 (ATCC<sup>®</sup> HTB-22<sup>™</sup>) and BT-474 (ATCC<sup>®</sup> HTB-20<sup>™</sup>) cells were obtained from the  
96 BIOS Centre for Biological Signaling Studies (Freiburg, Germany). MCF7 cells were  
97 cultured in DMEM, GlutaMAX<sup>™</sup> Supplement (31966021, Gibco<sup>™</sup>) and BT-474 cells were  
98 cultured in DMEM/F12, GlutaMAX<sup>™</sup> Supplement (31331028, Gibco<sup>™</sup>) in Nunc<sup>™</sup>  
99 EasYFlask<sup>™</sup> Cell Culture Flasks (156340, Thermo Scientific<sup>™</sup>). Both media were  
100 supplemented with 10 % FBS (10270106, Gibco<sup>™</sup>) and 1 % Pen/Strep (15140122, Gibco<sup>™</sup>).  
101 Cells were cultured until ~90 % confluency in a cell culture incubator (Heracell<sup>™</sup> 150i CO<sub>2</sub>  
102 Incubator, 50116048, Thermo Scientific<sup>™</sup>) under a 5 % CO<sub>2</sub> atmosphere at 37 °C. Cells were  
103 harvested with 1X TrypLE<sup>™</sup> Express Enzyme (12604021, Gibco<sup>™</sup>). Trypsin activity was  
104 quenched by addition of medium. The cells were washed twice with DPBS (14040133,  
105 Gibco<sup>™</sup>) and counted (Countess<sup>®</sup> II Automated Cell Counter, Invitrogen<sup>™</sup>) including  
106 live/dead staining with trypan blue (T10282, Invitrogen<sup>™</sup>).

107

108 2.2 Total RNA isolation and bulk cell lysis

109 Total RNA was isolated from 1x10<sup>6</sup> MCF7 and 1x10<sup>6</sup> BT-474 cells ('bulk') using the RNeasy  
110 Mini Kit (74104, Qiagen) in combination with the QIAshredder (79654, Qiagen) for lysate  
111 homogenization according to manufacturer's instructions. Simultaneously, total RNA was  
112 isolated using the *Quick-DNA/RNA* Microprep Plus Kit (D7005, Zymo Research) with an  
113 upfront proteinase K digest and on-column DNase I digest. RNA concentration (**Tab S3**) was  
114 measured with the NanoDrop<sup>™</sup> One (Thermo Scientific<sup>™</sup>). RNA integrity was checked on a  
115 1.2 % native agarose gel (2267.1, Roth) using 1X TBE buffer (3061.1, Roth) (**Fig S2c**). 1 µg  
116 total RNA was combined with 1X DNA Orange Loading Dye (R0631, Thermo Scientific<sup>™</sup>)  
117 and 60 to 75 % formamide (6749.3, Roth) and heated to 65 °C for 5 min before loading. RNA  
118 was visualized with 1X GelRed<sup>®</sup> Nucleic Acid Stain (SCT123, Milipore). Total RNA was  
119 diluted 1:20, 1:50, 1:100 and 1:1000 with PBS for MCF7 cells and 1:50, 1:100, 1:1000 and  
120 1:10000 with PBS for BT-474 cells. Each sample of the dilution series was analyzed  
121 regarding *ErbB2* and *ACTB* mRNA counts in triplicates using dPCR (2.5 Droplet digital  
122 PCR). The absolute gene mRNA counts per single cell were calculated by dividing the  
123 detected number of mRNAs with the number of cells (with respect to the dilution factor).  
124 Crude lysates ('cl') from 1x10<sup>6</sup> MCF7 and 1x10<sup>6</sup> BT-474 cells were prepared using 500 µl  
125 LBTW (lysis buffer from PICO Amplification Core (AMC) Kit, PICO-000010, Actome)  
126 proprietary buffer of Actome GmbH). The samples were incubated on ice for 5 min, sonicated  
127 for 1 min and cell debris were removed by centrifugation at 14000 xg at 4 °C for 10 min. The  
128 lysate was diluted with 49.5 ml DPBS (100X dilution), resulting in 20 cell equivalents per µl.

129 Thus, dispensation of 50 nl in to the ddPCR master mix using the I.DOT (2.3 Liquid  
130 dispensation using I.DOT) resulted in an equivalent amount of material to a single cell.

131

### 132 2.3 Liquid dispensation using I.DOT

133 The Immediate Drop-on-demand Technology (I.DOT One; Dispendix, Stuttgart,  
134 Germany) [42,43] with I.DOT PURE plates 90 µm orifice (Dispendix, Stuttgart, Germany)  
135 was used to dispense 0.5 µl LBTW into a 384-well V-bottom plate (0030623304,  
136 Eppendorf®) for single-cell dispensation (2.4 Single-cell dispensation using F.SIGHT™). The  
137 reduced volumes for down-scaled SMART-Seq® (2.6.1 cDNA synthesis using SMART-  
138 Seq® Single Cell Kit) and down-scaled library preparation (2.6.2 Library preparation using  
139 Nextera XT and sequencing) were dispensed using the I.DOT. Prior to dispensation, the  
140 I.DOT was calibrated for the applied liquids to ensure reliable dispensation.

141

### 142 2.4 Single-cell dispensation using F.SIGHT™

143 The single cell dispensing procedure was performed as described earlier [38,44,45]. The  
144 F.SIGHT™ single-cell dispenser (CYTENA GmbH, Freiburg, Germany) is an improved  
145 version of the single-cell printer (SCP) [38]. Both MCF7 and BT-474 cell concentrations were  
146 adjusted to  $1 \times 10^6$  cells/ml and loaded into a Dispensing Cartridge (CYTENA GmbH,  
147 Freiburg, Germany). The settings for MCF7 cells were 10 to 25 µm cells size (BT-474: 10 to  
148 30 µm) and 0.5 to 1 roundness (same for BT-474) (**Fig 1a**, **S3a** and **S3b**). The F.SIGHT™  
149 can reliably dispense single cells in minimal liquid volumes [45] within a short period of time  
150 (96 single cells per approx. 10 min). The single-cell dispensation efficiency (fraction of  
151 successful single-cell isolation events from targeted single-cell isolation events) is usually  
152 around 90 % [38], and is additionally controlled by cell images unambiguously assigned to  
153 each dispensation event (**Fig 1a**). Thus, other than single-cell dispensation events like  
154 multiple cells per droplet or empty droplets can be excluded.

155

### 156 2.5 Droplet digital PCR

157 *ErbB2* and *ACTB* mRNAs were analyzed using the naica® Crystal Digital PCR System (Stilla  
158 Technologies, Villejuif, France) [46]. Master mix was prepared as follows: 11.5 µl qScript  
159 XLT 1-Step RT-qPCR ToughMix (2X) (95132, Quantabio), 1.15 µl TaqMan Assay  
160 Hs01001580\_m1 (20X) (ErbB2) (4331182, Applied Biosystems™), 1.15 µl TaqMan Assay  
161 Hs01060665\_g1 (20X) (ACTB) (4448489, Applied Biosystems™), 0.23 µl fluorescein  
162 (100X, prepared according to “Fluorescein preparation for naica® system” from Stilla  
163 Technologies) (0681-100G, VWR Chemicals), 1 µl of diluted RNA sample (or a single cell),

164 ad 23  $\mu$ l H<sub>2</sub>O. After thorough mixing, 20  $\mu$ l of the reaction mix were transferred bubble-free  
165 to the chambers of the Sapphire Chips (Stilla Technologies, Villejuif, France). The dPCR  
166 conditions of the Geode cyclers were: partitioning of the reaction mix, cDNA synthesis (50 °C,  
167 10 min), initial denaturation (95 °C, 1 min); followed by 45 cycles of denaturation (95 °C,  
168 6 s), annealing and extension (60 °C, 45 s) and finally the pressure was released. The chips  
169 were transferred to the Prism3 reader and imaged using exposure times: 65 ms and 150 ms for  
170 FAM and HEX channel (82 mm focus). Afterwards, droplet quality was manually controlled  
171 and in case of poor quality, e.g. coalescence or air bubbles, the respective areas were excluded  
172 from further analysis. All NTCs were negative (data not shown). The average droplet volume  
173 using 1X qScript XLT 1-Step RT-qPCR ToughMix is 0.548 nl. Hence, the corresponding  
174 analysis configuration file was used for quantification (User Manual v2.1 of the Crystal Miner  
175 Software, Stilla Technologies, 2018). We comply with the dMIQE guidelines [47,48] and  
176 report all essential information (**Tab S7**).

177

## 178 2.6 Down-scaled single-cell RNA sequencing

### 179 2.6.1 cDNA synthesis using SMART-Seq® Single Cell Kit

180 For cDNA synthesis the SMART-Seq® Single Cell Kit (634472, Takara BIO) at 1/10 of the  
181 original reaction volume was used (down-scaled SMART-Seq® workflow). Briefly, 1.15  $\mu$ l  
182 of the lysis buffer (0.1  $\mu$ l Reaction Buffer, 0.1  $\mu$ l 3' SMART-Seq CDS Primer II A and  
183 0.95  $\mu$ l dH<sub>2</sub>O) were dispensed in skirted 384-well PCR plates (4ti-0384/X, 4titude) using the  
184 I.DOT. Subsequently, single cells (84 cells per cell line) and NTCs (empty droplets) were  
185 dispensed into the lysis buffer. The plates were sealed (AB0558, Thermo Scientific™) and  
186 snap-frozen at -80 °C until further processing. After thawing, primers were annealed in a  
187 C1000 Touch™ Thermal Cycler (Bio-Rad Laboratories, Hercules, CA, USA) at 72 °C for  
188 3 min. Afterwards, 0.75  $\mu$ l of RT Master Mix (0.4  $\mu$ l SMART-Seq sc First Strand Buffer,  
189 0.1  $\mu$ l SMART-Seq sc TSO, 0.05  $\mu$ l RNase Inhibitor and 0.2  $\mu$ l SMARTScribe II Reverse  
190 Transcriptase) were added to each well using the I.DOT. The plate was processed in the  
191 C1000 Thermal Cycler for cDNA synthesis at 42 °C for 180 min, 70 °C for 10 min and 4 °C  
192 hold. Next, 3  $\mu$ l PCR Master Mix (2.5  $\mu$ l SeqAmpCB PCR Buffer (2X), 0.1  $\mu$ l PCR Primer,  
193 0.1  $\mu$ l SeqAmp DNA Polymerase and 0.3  $\mu$ l dH<sub>2</sub>O) were added to each well and cDNA was  
194 amplified (95 °C for 1 min, 19 cycles: 98 °C for 10 sec, 65 °C for 30 sec, and 68 °C for 3 min;  
195 72 °C for 10 min and 4 °C hold). Purification of cDNA was performed manually using 9  $\mu$ l of  
196 AMPure XP bead suspension (A63880, Beckman Coulter) per well according to  
197 manufacturer's instructions. In brief, beads and cDNA were incubated for 8 min at room  
198 temperature. The beads were separated using conventional neodym magnets for 5 min and  
199 beads were washed with 30  $\mu$ l 80 % ethanol for 30 sec. Afterwards, the beads were  
200 resuspended in 17  $\mu$ l 10 mM Tris-HCl and incubated for 8 min at room temperature. The

201 beads were separated using magnetic separation for 5 min. 15  $\mu$ l supernatant of each well  
202 were transferred to a fresh 384-well plate. The cDNA quantity was determined with the  
203 Quant-iT<sup>TM</sup> PicoGreen<sup>TM</sup> dsDNA Assay Kit (P7589, Invitrogen<sup>TM</sup>) in 384-well plates (4ti-  
204 0203, 4titude). Fluorescent intensities were measured using the Spark 10M Microplate Reader  
205 (Tecan, Männedorf, Switzerland). cDNA quality was determined with Agilent's 2100  
206 Bioanalyzer using the High Sensitivity DNA Kit (5067-4626, Agilent) according to  
207 manufacturer's instructions (representative images in **Fig 1b**).

208

#### 209 2.6.2 Library preparation using Nextera XT and sequencing

210 Prior to tagmentation cDNA was normalized to 0.2 ng/ $\mu$ l. Tagmentation was performed using  
211 the Nextera XT DNA Library Preparation Kit (FC-131-1024, Illumina) at 10-fold  
212 down-scaled reaction volumes. 1  $\mu$ l of Tagment DNA Buffer and 0.5  $\mu$ l Amplicon Tagment  
213 Mix were added to each well using the I.DOT. The amplified and purified cDNA was  
214 tagmented for 8 min at 55 °C in a C1000 Thermal Cycler. Transposase activity was quenched  
215 by addition of 0.5  $\mu$ l Neutralize Tagment Buffer using the I.DOT (< 1 min) and incubation at  
216 room temperature for 5 min. MCF7 and BT-474 libraries were independently amplified with  
217 index primers N7xx and S5xx of Nextera XT Index Kit v2 Set A (FC-131-2001, Illumina) and  
218 Nextera XT Index Kit v2 Set B (FC-131-2002, Illumina). 1.5  $\mu$ l Nextera PCR Master Mix and  
219 0.5  $\mu$ l of a unique combination of primers were added to each well using the I.DOT and  
220 tagmented cDNA was amplified in a C1000 Thermal Cycler (72 °C for 3 min, 95 °C for  
221 30 sec, 12 cycles: 95 °C for 10 sec, 55 °C for 30 sec, and 72 °C for 30 sec; 72 °C for 5 min  
222 and 10 °C hold). The cDNA libraries for MCF7 and BT-474 were pooled separately (total  
223 volume ~ 420  $\mu$ l), and purified according to the previously mentioned bead clean-up  
224 procedure (using 0.6 to 1-fold AMPure XP bead suspension, A63880, Beckman Coulter),  
225 except that after removal of ethanol, 75  $\mu$ l of resuspension buffer were added and incubated  
226 for 3 min. 73  $\mu$ l of eluted library were transferred to a fresh tube. The quality of tagmented  
227 libraries was determined using the High Sensitivity DNA Kit on Agilent's 2100 Bioanalyzer  
228 (representative images in **Fig 1c**). The pooled library was sequenced on the NextSeq 500  
229 System (Illumina, San Diego, CA, USA) using the High-Output v2.5 Kit (20024906,  
230 Illumina) with 75 bp single-end reads.

231

#### 232 2.6.3 Bioinformatics data analysis

233 FASTQ files were generated with bcl2fastq v2.20 (“--no-lane-splitting” flag). Sample quality  
234 was assessed with FASTQC v0.11.9 (exemplary images: **Fig S1**). The aligners, salmon v1.3.0  
235 [49], kallisto v0.46.1 [50] and STAR 2.7.5c [51], were wrapped into bash scripts and the  
236 FASTQ files were separately aligned to the GRCh38 cDNA reference transcriptome  
237 from Ensembl using salmon (“--validateMappings” flag) or kallisto as well as to the



238 GRCh38.p13 genome with STAR in solo mode. As recommended for salmon and kallisto, the  
239 mean read length and the standard deviation were calculated for each file. For STAR aligner,  
240 a genome index was calculated. The outputs were analyzed in Jupyter Notebooks [52]  
241 (jupyter core v4.7.0, jupyter-notebook v6.1.6) using R version 4.1.2. Transcript abundances  
242 (TPM) and count estimates were imported with the tximeta [53] package for salmon and  
243 tximport [54] for kallisto and summarized to genes using the summarizeToGene() statement.  
244 STAR alignment files were counted with featureCounts v2.0.3 [55] and the count matrices  
245 were directly imported. Cells with an alignment efficiency below 80 % were filtered out  
246 (salmon and kallisto) (**Fig 1d** and **Tab S1**). Cells with less than 60 % of uniquely mapped  
247 reads were filtered out (STAR) (**Fig 1e** and **Tab S1**). In both cases cells with at least 1E+5  
248 detected reads were considered. Pseudo-bulk differential expression analysis was performed  
249 with DESeq2 v1.32.0 [56] on count matrices using LRT testing and suggested parameters for  
250 single-cell testing. In order to evaluate transcriptional similarity between cells assayed using  
251 our down-scaled SMART-Seq® (salmon aligner only) and published data (GSE151334) [4],  
252 the datasets were concatenated into a single AnnData object and imported into SCANPY  
253 (v1.8.1) [57]. Cells with fewer than 200 genes expressed and genes expressed in less than  
254 three cells were excluded from further analysis. Counts per cell were normalized with  
255 SCANPY's built-in normalization method and log-transformed according to the standard  
256 workflow recommended in the SCANPY documentation. Batch-correction was performed  
257 with BBKNN [58]. Dimensionality reduction was performed with SCANPY's built-in  
258 UMAP-function (uniform manifold approximation and projection). Scripts for the here  
259 described analysis are available from [github.com/LangeTo/scRNA-seq\\_scripts](https://github.com/LangeTo/scRNA-seq_scripts).

260

## 261 2.7 Statistical analysis

262 Groups were initially tested for normal distribution (Shapiro-Wilk test) and for  
263 homoscedasticity (F-test) upon which information a suitable test was chosen (if not stated  
264 differently): Mann-Whitney test (normal distribution rejected), Welch's t-test (normal  
265 distribution, heteroscedasticity) or Student's t-test (normal distribution, homoscedasticity).  
266 Distributions were compared using the Kolmogorov-Smirnov test. Bonferroni correction was  
267 applied for multiple testing corrections. Significance levels are indicated as follows:  
268 \*\*\*  $p < 0.001$ , \*\*  $p < 0.01$ , \*  $p < 0.05$ , ns  $p > 0.05$ . Boxplots indicate the inner quartiles of the  
269 data (25 % to 75 %). Whiskers show 1.5xIQR (interquartile range). The median is drawn as a  
270 horizontal line. The mean is represented by a square. Individual data points are shown as dots.  
271 All plots and statistical analyses were performed with OriginPro 2021 (OriginLab  
272 Corporation).

273

## 274 2.8 Bootstrapping comparison

275 To compare fold changes between two methods (*a*: scRNA-seq and *b*: scRT-ddPCR), we used  
276 a bootstrapping comparison because regular statistical tests suffer from p-value inflation after  
277 repetitive bootstrapping. The algorithm is described in **Fig S4** based on the ratio  $r_g$  (**Eq 1**). In  
278 brief, four arrays of expression values are needed (one per cell line and per method). A subset  
279 of each initial expression array is randomly subsampled with replacement (same length as  
280 initial array). The log<sub>2</sub>FCs of the means of these expression arrays are calculated per method.  
281 Then the ratio  $r_g$  of these log<sub>2</sub>FCs is determined (**Eq 1**). Subsampling and ratio calculation is  
282 repeated 1,000 times. Finally, mean and 95 % confidence intervals (CI) of the new array  $r_g$  is  
283 determined. If the 95 % CI overlaps with 1, the methods are assumed to yield the same fold  
284 change.

$$r_g = \frac{\log_2 \left( \frac{\overline{gene} x_{MCF7}}{\overline{gene} x_{BT-474}} \right)_a}{\log_2 \left( \frac{\overline{gene} x_{MCF7}}{\overline{gene} x_{BT-474}} \right)_b} \quad (1)$$

285

## 286 3 Results

### 287 3.1 Down-scaling of SMART-Seq®

288 It is hypothesized that down-scaling of reaction volumes improves sensitivity [59],  
289 while conserving data quality [4,60–62]. This idea follows the concept of dPCR [36], where  
290 down-scaling (by partitioning) is an inherent feature, which enhances molecular detections by  
291 increasing the effective concentration of nucleic acids. Thus, we down-scaled our scRNA-seq  
292 reaction volumes to yield the most precise log<sub>2</sub>FCs. We used the F.SIGHT™ (CYTENA  
293 GmbH, Freiburg) for single cell isolation and the I.DOT (Dispendix, Stuttgart) for contact-  
294 free liquid handling. The F.SIGHT™ uses a microfluidic chip generating free-flying,  
295 picoliter-sized droplets in which single cells are encapsulated and delivered to the microplate  
296 [34,35,38]. Image-based analysis intercepts a permanent vacuum suction when single cells of  
297 the desired morphological criteria are detected in the nozzle. High precision is ensured by  
298 automatic dispenser offset compensation (AOC) enabling single-cell deposition into few  
299 hundred nanoliters in 384-well plates [45]. Simultaneously, the F.SIGHT™ records an image  
300 series for each dispensation event, which can be unambiguously assigned to the addressed  
301 well of the microplate [38]. Based on the images, the cells can be qualitatively stratified  
302 according to roundness and size from a heterogeneous population of particles (**Fig 1a**, only  
303 colored dots are dispensed cells, the grey dots are either artefacts or cells that could not be  
304 isolated) resulting in a homogeneous cell population (**Fig 1a**, boxplots at the edges). We  
305 manually analyzed all images from putative single cells (84 cells per cell line) and found that  
306 7 % (MCF7) and 4 % (BT-474) were doublets or empty droplets (**Tab S1**). The cells were  
307 directly dispensed into the lysis buffer and processed by down-scaled SMART-Seq® and  
308 down-scaled Nextera XT protocols (2.6.1 cDNA synthesis using SMART-Seq® Single Cell  
309 Kit and 2.6.2 Library preparation using Nextera XT and sequencing). The average fragment  
310 length for tagmented cDNA was 459 bp and 432 bp for MCF7 and BT-474 cells, respectively.  
311 According to Jaeger *et al.* [62], this is an indication for good quality, tagmented cDNA.  
312 Representative electropherograms of cDNA and tagmented cDNA are shown in **Fig 1b** and  
313 **1c**. FastQC analysis revealed an average Phred score of above 30 for both cell lines (**Fig S1**).  
314 We analyzed sequencing data using three common aligners: salmon [49], kallisto [50] and  
315 STAR [51]. Based on alignment efficiency  $\geq 80$  % (salmon and kallisto) or fraction of  
316 uniquely mapped reads  $\geq 60$  % (STAR), cells of poor quality were excluded from downstream  
317 analysis (**Fig 1d** and **1e** and **Tab S1**). Further on, cells with less than 1E+5 reads were also  
318 excluded from analysis (**Fig 1f** and **Tab S1**). All aligners yielded the same number of genes  
319 per cell. 11676 genes per single MCF7 cell and 11682 genes per single BT-474 cell were  
320 detected (**Fig 1g**). We also clustered our data with external data from Isakova *et al.* [4], who  
321 used 10-fold down-scaled Smart-seq2 protocol. The clusters of MCF7 cells exactly overlap,  
322 while other cells formed independent clusters like the reference cell lines HEK293T and  
323 fibroblasts (**Fig 2a**). We performed pseudo-bulk DE analysis with different input to DESeq2

324 (salmon, kallisto or STAR aligner count matrices) (**Fig 2c, 2d** and **Tab S2**). Interestingly,  
325 salmon and kallisto predict the highly significant overexpression of *OLFML3*, *RAMP3* and  
326 *VWA5A* (only salmon), which we could not observe with STAR aligner (**Fig 2c**). To our  
327 knowledge there is no supporting evidence for this overexpression in MCF7 cells in literature.  
328 Furthermore, STAR aligner input to DESeq2 predicts clearly more DEGs in MCF7 than the  
329 other two aligners (**Fig 2d**). We found that *ErbB2* is significantly overexpressed in BT-474  
330 cells as previously described [39], while *ACTB* as a housekeeping gene is not significantly  
331 different between the cell lines (**Fig 2c** and **Tab S2**). These findings are consistent across all  
332 aligners. Additionally, we evaluated the expression of two marker genes for MCF7 cells,  
333 *KRT8* and *TFF1* [4]. *TFF1* is overexpressed in MCF7 cells, while *KRT8* shows differential  
334 expression only with STAR aligner input to DESeq2 (**Fig 2c** and **Tab S2**). This underlines  
335 furthermore the dissimilarity of the aligners used.

336

### 337 3.2 Validation of scRT-ddPCR using bulk methods

338 For scRT-ddPCR, we isolated cells on the same day and from the same culture as in the case  
339 of down-scaled SMART-Seq® using F.SIGHT™ and I.DOT except that the cells were  
340 dispensed into LBTW (**Fig S3a** and **S3b**). After lysis, the gene mRNA per cell counts were  
341 determined directly from the lysate using digital PCR. First, we investigated varied volumes  
342 of LBTW lysis buffer, as the carry-over of detergents may impair droplet formation or reverse  
343 transcription and thus PCR efficiency [31,63]. The results indicate that as the volume of lysis  
344 buffer increases, the number of formed droplets decreases (**Fig 3a**) due to increased areas of  
345 coalescence (**Fig S2a**). The use of 0.5 µl LBTW produces no areas of coalescence and the  
346 number of droplets is not significantly reduced, despite a drop of ~18 % in total droplet  
347 number (**Fig 3a**). Similarly, we could not detect a significant difference between the *ErbB2*  
348 and *ACTB* mRNA concentrations upon different volumes of lysis buffer (**Fig S2b**). Thus, we  
349 used 0.5 µl lysis buffer in subsequent experiments. Of note, at low target concentrations the  
350 subsampling error becomes significant [36] due to the loss of mRNAs in the non-partitioned  
351 (dead) volume (~34 % according to manufacturer's information). We reduced the loaded  
352 master mix volume without performance effects (data not shown) to minimize the loss of  
353 transcripts (~18 % dead volume). The well-documented differential expression of *ErbB2* in  
354 MCF7 and BT-474 cells [39–41] was taken advantage to demonstrate the ability of our scRT-  
355 ddPCR for absolute quantification. We could observe an expression of  
356 9 *ErbB2* mRNA/MCF7 cell (79 % CV), while BT-474 cells expressed a ~50-fold higher  
357 amount (453 *ErbB2* mRNA/BT-474 cell (42 % CV)) (**Fig 3b** and **Tab S5**). Durst *et al.* could  
358 observe the same fold difference [39]. On the other hand, we could not detect a significant  
359 difference in *ACTB* expression between the cell lines (66 *ACTB* mRNA/MCF7 cell with  
360 44 % CV and 114 *ACTB* mRNA/BT-474 cell with 70 % CV,  $p > 0.05$ , Mann-Whitney test  
361 with Bonferroni correction; **Fig 3b** and **Tab S5**). The F.SIGHT™ records morphological  
362 details of each dispensed cell but we could not detect any correlation between cell size and  
363 number of mRNAs per single cell (**Fig S3c** and **S3d**). These mRNA counts could be biased by  
364 incomplete lysis of the single cell. To verify these mRNA counts, we checked the ability of  
365 the lysis buffer (LBTW) to exert full dispersion of cell material prior to compartmentalization.  
366 Thus, we used two commercially available methods for total RNA isolation, for which we  
367 assume a 100 % isolation efficiency ('bulk'). The two methods differ in sample preparation  
368 (DNase I digest vs. no digest and enzymatic lysate homogenization vs. mechanical lysate  
369 homogenization), buffers and handling in general, but resulted in the same amount of *ErbB2*  
370 or *ACTB* mRNAs per cell (**Fig S2d**). Of note, the RNA quality differs between the two  
371 methods (**Fig S2c** and **Tab S3**). Similarly, a single-cell volume equivalent from a crude lysate  
372 ('cl') cells was dispensed into the dPCR mix and *ErbB2* and *ACTB* counts per single cell were  
373 determined to validate that the lysis conditions have no effect on dPCR or the detection of the  
374 transcripts. Comparing these extraction methods ('sc', 'bulk', 'cl') for BT-474 cells yields no  
375 significant differences for both genes *ErbB2* or *ACTB* (**Fig 3b**). Also *ErbB2* counts in MCF7

376 cells are not significantly different between extraction methods. However, *ACTB* counts from  
377 ‘bulk’ are significantly higher than from ‘sc’ or ‘cl’ ( $p < 0.001$ , Mann-Whitney test with  
378 Bonferroni correction). Although, *ACTB* is considered to be a housekeeping gene, its  
379 variability due to possible uncontrolled conditions is already described [64]. In this given case  
380 we assume, the variability might be related to the different passage numbers (**Tab S4**) or to a  
381 different confluency state of the cell culture. Overall, the results of absolute gene mRNA  
382 counts of total bulk RNA isolation methods and similarly the results of the crude lysates  
383 confirm unbiased, quantitative transcript detection by our scRT-ddPCR method (**Fig 3b**). The  
384 larger CVs of single-cell data compared to ‘bulk’ and ‘cl’ (**Tab S5**) are expected and  
385 considered to recapitulate expression variability.

386

### 387 3.3 Comparison of down-scaled SMART-Seq® and scRT-ddPCR

388 Conclusions made solely on the basis of scRNA-seq might be biased because of noise and  
389 dropouts and thus need confirmation by PCR means [25]. Because of increased sensitivity,  
390 absolute quantification and higher tolerance towards inhibitors [17,32,36,37], we chose  
391 scRT-ddPCR for unbiased validation of scRNA-seq data. Furthermore, dPCR provides an  
392 orthogonal validation as mRNAs are non-competitively but simultaneously transcribed into  
393 cDNAs (partitioning). Thus, the detection events are independent, while in scRNA-seq  
394 multiple mRNAs are reverse transcribed in a bulk reaction resulting in competitions and  
395 increased propensity for dropouts. Further, we sought to minimize biological and technical  
396 variability between the methods by using cells from the same population and the same high  
397 precision instrumentation regarding single-cell isolation and liquid handling. We constructed  
398 signal distributions of *ErbB2* and *ACTB* expression in MCF7 and BT-474 cells using TPM  
399 values from salmon and kallisto, raw counts from STAR aligner or absolute gene mRNA  
400 counts per cell from scRT-ddPCR and normalized them to the maximum value per dataset  
401 (based on values from **Fig 2b** and **3b**). For *ErbB2* expression in MCF7 cells, we found for  
402 scRNA-seq a typical zero-inflation for low abundant targets (~ 80 % of cells in the first bin;  
403 **Fig 4a**, strongly skewed distributions **Tab S6**) [13,14,65]. We observed this behavior also for  
404 already published down-scaled Smart-seq2 data from Isakova *et al.* [4]. However, this  
405 distribution differs from our scRNA-seq pipelines (Kolmogorov-Smirnov test with Bonferroni  
406 multiple testing correction). For the *ErbB2* signal distribution from MCF7 scRT-ddPCR data,  
407 we observed a significantly different shape as we could not observe an accumulation of cells  
408 in a bin of the histogram and the skewness is much lower (**Tab S6**). For high-abundant  
409 transcripts such as *ErbB2* in BT-474 cells, we could detect differences between the alignment  
410 tools especially between salmon and kallisto, and STAR. This difference might be justified by  
411 the missing normalization of raw counts from STAR aligner or by using the genome as  
412 alignment reference. However, *ACTB* signal distributions show no such behavior, but data  
413 from Isakova *et al.* are strikingly different compared to all our approaches (**Fig 4b**). Based on  
414 the expression values (**Fig 2b** and **Fig 3b**), we calculated log<sub>2</sub>FCs (MCF7 vs. BT-474) (**Fig**  
415 **4c**). Additionally, we bootstrapped and down-sampled the scRNA-seq groups to the same  
416 sample size as the scRT-ddPCR group to eliminate subsampling errors (**Fig 4c**, shaded bars).  
417 The so calculated log<sub>2</sub>FCs do not differ from the log<sub>2</sub>FCs calculated by DESeq2 (blue and  
418 green arrows; **Fig 2c**, **4c** and **Tab S2**). All *ACTB* log<sub>2</sub>FCs from scRNA-seq and scRT-ddPCR  
419 fluctuate within  $0 \pm 1$ , which is the null hypothesis of DESeq2 [56], meaning that there is no  
420 differential expression between cell lines (**Fig 4c**). The fluctuation probably depicts statistical  
421 noise. To compare log<sub>2</sub>FCs between methods, we bootstrapped their ratio and calculated  
422 95 % CIs. If these 95 % CIs overlap with 1, the methods are assumed to determine the same  
423 log<sub>2</sub>FC (**Eq 1** and **Fig S4**). Log<sub>2</sub>FCs from both, scRNA-seq (with salmon, kallisto or STAR  
424 aligner) and scRT-ddPCR, confirm the overexpression of *ErbB2* in BT-474 cells, although to  
425 a significantly different extent, while we could not detect any difference between the log<sub>2</sub>FCs

426 from the different aligners (**Fig 4c**). scRT-ddPCR predicts significantly stronger  
427 overexpression of *ErbB2* in BT-474 cells. This can potentially be explained by the biased  
428 detection of *ErbB2* expression in MCF7 cells by scRNA-seq (**Fig 4a**).



#### 429 4 Discussion

430 In this study, we present a novel, orthogonal method, scRT-ddPCR, for the validation of  
431 scRNA-seq fold changes. Durst *et al.* found that absolute quantification is the most reliable  
432 approach for single-cell analysis [39], which is the key feature of dPCR and delivers a ground  
433 truth that facilitates inter-experimental comparisons as it is detached from any standard. This  
434 is achieved by the inherent partitioning of dPCR, which further allows spatially separated but  
435 simultaneous reverse transcription of mRNAs. This potentially improves cDNA capture  
436 through enrichment. Thus, for low-abundant transcripts, which are often referred to as highly  
437 interesting but difficult to reliably analyze [15–18], dPCR might therefore be of great  
438 advantage.

439 First, we aimed to enhance molecular detections for SMART-Seq® by down-scaling, which is  
440 frequently applied to scRNA-seq protocols to increase throughput, reduce costs, and increase  
441 sensitivity, while maintaining data quality [4,59–62]. We demonstrated that our down-scaled  
442 SMART-Seq® protocol using F.SIGHT™ and I.DOT delivers high quality data (**Fig 1, S1**  
443 and **Tab S1**). We validated our method by comparative UMAP-clustering against published,  
444 down-scaled data [4] and found excellent conformity (**Fig 2a**). Compared to 3'-counting  
445 methods such as the Chromium system [24], full-length protocols such as SMART-Seq®  
446 have already demonstrated better coverage of low-abundant transcripts [3,23], but are still not  
447 sensitive enough to detect low-abundant *ErbB2* mRNA in MCF7 cells as we show (**Fig 4a**).  
448 We relate these dropouts to the simultaneous reverse transcription of multiple  
449 poly(A)-mRNAs into cDNAs. Thus, our data support previous findings of dropouts in  
450 scRNA-seq [13,14].

451 Secondly, we successfully validated our scRT-ddPCR method (**Fig 3 and S2**), which  
452 underlines that scRT-ddPCR can serve as a ground truth. We could detect *ErbB2* expression  
453 in MCF7 cells without dropouts (**Fig 4a**) potentially because of the inherent partitioning step  
454 in dPCR, which increases the effective mRNA concentration [36]. *ErbB2* expression in BT-  
455 474 cells and *ACTB* expression in MCF7 and BT-474 cells could be similarly detected (**Fig**  
456 **3b, 4a and 4b**). Thus, our proposed scRT-ddPCR method can reliably and absolutely quantify  
457 low- and high-abundant transcripts offering a solution for fold change validation. However, a  
458 drawback of dPCRs is the degree of multiplexing, which limits the genes to analyze. At the  
459 time we conducted the experiments, the highest degree of multiplexing was three colors [46].  
460 Recent developments in dPCR instrumentation allow five (QIAcuity, Qiagen) or six (Prims6,  
461 Stilla Technologies) color detection. Most of the existing approaches for scRNA-seq validation  
462 use qPCR [26–30], but also these cyclers do not offer higher degree of multiplexing than six.  
463 Alternatively, approaches of monochrome multiplexing, such as photo bleaching, could be  
464 used to extend the degree of multiplexing beyond hardware limitations [66,67].

465 Finally, we compared log<sub>2</sub>FCs from scRNA-seq and scRT-ddPCR and found that *ACTB*  
466 log<sub>2</sub>FCs from scRNA-seq were not different from scRT-ddPCR log<sub>2</sub>FCs (**Fig 4c**). In both  
467 cell lines, *ACTB* expression has a good signal distribution for scRT-ddPCR and all aligners

468 used in scRNA-seq (**Fig 4b** and **Tab S6**). Strikingly, the signal distribution obtained from  
469 published data shows a much stronger skewness (**Fig 4b** and **Tab S6**), which could be an  
470 indication that our down-scaled protocol using F.SIGHT™ and I.DOT performs better than  
471 existing down-scaled versions. While *ErbB2* fold changes are consistent among the aligners  
472 used, we found a significant difference between scRNA-seq and scRT-ddPCR (**Fig 4c**). We  
473 hypothesize that these differences originate from the heavily skewed signal distributions  
474 (skewness  $\approx 3$ ) of *ErbB2* in MCF7 cells, which indicate dropouts (**Fig 4a** and **Tab S6**).  
475 However, scRNA-seq and scRT-ddPCR use different priming strategies for cDNA synthesis  
476 [68] and in scRNA-seq protocols more PCR steps are included (i.e. cDNA amplification,  
477 tagged library amplification, bridge amplification), which potentiate biases and promote  
478 dropouts. Biases in scRNA-seq could also originate from the bioinformatics tools used as we  
479 observe that some genes are predicted to be overexpressed with some aligners (**Fig 2c** and **2d**)  
480 and that overexpression is not consistent across the aligners (**Tab S2**).  
481 In this study, we only evaluate the impact of dropouts on individual fold changes but we  
482 assume that this has far-reaching implications on DE analyses and their conclusions,  
483 especially since this is not an issue limited to scRNA-seq but also exists in conventional  
484 RNA-seq [69–71]. However, it is pronounced in scRNA-seq because of low sample input  
485 [13,14]. In concordance with this, we could show that the alignment tool has an impact on the  
486 amount of DEGs and on the fold changes (**Fig 2c, 2d, 4c** and **Tab S2**). This underlines the  
487 necessity for an independent validation method that allows the reliable detection of absolute  
488 mRNA counts such as our scRT-ddPCR. Our here presented scRT-ddPCR method can thus  
489 serve as a platform for mRNA analysis but could also be extended to the protein [31] and  
490 DNA analysis [72] or different cell types [45]. On top of that, it is compatible with any plate-  
491 based sequencing protocol such as Smart-seq3, Smart-seq3xpress or FLASH-seq [60,61,73].  
492 In conclusion, we think this method is a valuable addition to the toolbox of researchers  
493 interested in single-cell transcriptomics because of its reliability, ease of use, reduced costs,  
494 and increased sensitivity.  
495

496 Author contribution statement

497 Conceptualization: Csaba Jeney, Tobias Lange

498 Investigation: Tobias Lange, Tobias Groß

499 Methodology: Tobias Lange, Julia Scherzinger, Elly Sinkala, Ábris Jeney, Csaba Jeney,  
500 Tobias Groß

501 Formal analysis: Tobias Lange, Ábris Jeney

502 Supervision and funding acquisition: Csaba Jeney, Stefan Zimmermann, Peter Koltay, Felix  
503 von Stetten, Roland Zengerle

504 Writing – original draft: Tobias Lange

505 Writing – review and editing: Csaba Jeney, Stefan Zimmermann, Peter Koltay, Felix von  
506 Stetten, Roland Zengerle, Christoph Niemöller, Tobias Lange, Tobias Groß, Ábris Jeney  
507

508 All authors read and approved the final version of the manuscript.

509

510 Declaration of competing interest

511 J.S., E.S. and C.N. are employees of CYTENA GmbH, which produces the F.SIGHT™  
512 single-cell dispenser used in this study. T.L., T.G., P.K, and C.J. are employees of Actome  
513 GmbH, which develops the LBT lysis buffer used in this study and P.K., R.Z. and C.J. are  
514 shareholders of Actome GmbH. The remaining authors declare no competing interest.

515

516 Data and code availability

517 scRNA-seq data is available from GEO under accession number: [GSE201443](https://www.ncbi.nlm.nih.gov/geo/query/acc.cgi?acc=GSE201443). Jupyter  
518 notebooks for the analysis of our scRNA-seq data are available from  
519 [github.com/LangeTo/scRNA-seq\\_scripts](https://github.com/LangeTo/scRNA-seq_scripts). The code for bootstrapping comparison is available  
520 upon reasonable request.

521

522 Acknowledgments

523 We would like to thank the Actome GmbH for providing research licenses, for help with  
524 laboratory work and for advices on the manuscript. We would like to acknowledge the  
525 Lighthouse Core Facility of the Universitätsklinikum Freiburg for assistance with dPCR.  
526 Lighthouse Core Facility is funded in part by the Medical Faculty, University of Freiburg  
527 (Project Number 2021/A2-Fol). We appreciate the RNA isolation kit gift form Zymo  
528 Research Europe (Freiburg). We acknowledge Martin Adam Stoffel (University of  
529 Edinburgh) for ideas on bootstrapping. This work was supported by grants from the Baden-  
530 Württemberg Stiftung in the framework of “Methoden in den Lebenswissenschaften”  
531 (MONOGRAM – MET-ID55) and the Ministerium für Wissenschaft, Forschung und Kunst  
532 Baden-Württemberg (DINAMIK – 7533-7-11.10-6).

533

534 References

- 535 [1] H.C. Fan, G.K. Fu, S.P.A. Fodor, Combinatorial labeling of single cells for gene  
536 expression cytometry, *Science* (80-. ). 347 (2015).  
537 <https://doi.org/10.1126/science.1258367>.
- 538 [2] G. Chen, B. Ning, T. Shi, Single-cell RNA-seq technologies and related computational  
539 data analysis, *Front. Genet.* 10 (2019) 1–13. <https://doi.org/10.3389/fgene.2019.00317>.
- 540 [3] C. Ziegenhain, B. Vieth, S. Parekh, B. Reinius, A. Guillaumet-Adkins, M. Smets, H.  
541 Leonhardt, H. Heyn, I. Hellmann, W. Enard, Comparative Analysis of Single-Cell  
542 RNA Sequencing Methods, *Mol. Cell.* 65 (2017) 631-643.e4.  
543 <https://doi.org/10.1016/j.molcel.2017.01.023>.
- 544 [4] A. Isakova, N. Neff, S.R. Quake, Single-cell quantification of a broad RNA spectrum  
545 reveals unique noncoding patterns associated with cell types and states, *Proc. Natl.*  
546 *Acad. Sci. U. S. A.* 118 (2021) 1–9. <https://doi.org/10.1073/pnas.2113568118>.
- 547 [5] S.M. Shaffer, M.C. Dunagin, S.R. Torborg, E.A. Torre, B. Emert, C. Krepler, M.  
548 Beqiri, K. Sproesser, P.A. Brafford, M. Xiao, E. Eggan, I.N. Anastopoulos, C.A.  
549 Vargas-Garcia, A. Singh, K.L. Nathanson, M. Herlyn, A. Raj, Rare cell variability and  
550 drug-induced reprogramming as a mode of cancer drug resistance, *Nature.* 546 (2017)  
551 431–435. <https://doi.org/10.1038/nature22794>.
- 552 [6] S. Islam, A. Zeisel, S. Joost, G. La Manno, P. Zajac, M. Kasper, P. Lönnerberg, S.  
553 Linnarsson, Quantitative single-cell RNA-seq with unique molecular identifiers, *Nat.*  
554 *Methods.* 11 (2014) 163–166. <https://doi.org/10.1038/nmeth.2772>.
- 555 [7] P. van Galen, V. Hovestadt, M.H. Wadsworth II, T.K. Hughes, G.K. Griffin, S.  
556 Battaglia, J.A. Verga, J. Stephansky, T.J. Pastika, J. Lombardi Story, G.S. Pinkus, O.  
557 Pozdnyakova, I. Galinsky, R.M. Stone, T.A. Graubert, A.K. Shalek, J.C. Aster, A.A.  
558 Lane, B.E. Bernstein, Single-Cell RNA-Seq Reveals AML Hierarchies Relevant to  
559 Disease Progression and Immunity, *Cell.* 176 (2019) 1265-1281.e24.  
560 <https://doi.org/10.1016/j.cell.2019.01.031>.
- 561 [8] K.T. Kim, H.W. Lee, H.O. Lee, S.C. Kim, Y.J. Seo, W. Chung, H.H. Eum, D.H. Nam,  
562 J. Kim, K.M. Joo, W.Y. Park, Single-cell mRNA sequencing identifies subclonal  
563 heterogeneity in anti-cancer drug responses of lung adenocarcinoma cells, *Genome*  
564 *Biol.* 16 (2015) 1–15. <https://doi.org/10.1186/s13059-015-0692-3>.
- 565 [9] I. Tirosh, B. Izar, S.M. Prakadan, M.H. Wadsworth, D. Treacy, J.J. Trombetta, A.  
566 Rotem, C. Rodman, C. Lian, G. Murphy, M. Fallahi-Sichani, K. Dutton-Regester, J.R.  
567 Lin, O. Cohen, P. Shah, D. Lu, A.S. Genshaft, T.K. Hughes, C.G.K. Ziegler, S.W.  
568 Kazer, A. Gaillard, K.E. Kolb, A.C. Villani, C.M. Johannessen, A.Y. Andreev, E.M.  
569 Van Allen, M. Bertagnolli, P.K. Sorger, R.J. Sullivan, K.T. Flaherty, D.T. Frederick, J.  
570 Jané-Valbuena, C.H. Yoon, O. Rozenblatt-Rosen, A.K. Shalek, A. Regev, L.A.  
571 Garraway, Dissecting the multicellular ecosystem of metastatic melanoma by single-  
572 cell RNA-seq, *Science* (80-. ). 352 (2016) 189–196.  
573 <https://doi.org/10.1126/science.aad0501>.
- 574 [10] A. Conesa, P. Madrigal, S. Tarazona, D. Gomez-Cabrero, A. Cervera, A. McPherson,  
575 M.W. Szczesniak, D.J. Gaffney, L.L. Elo, X. Zhang, A. Mortazavi, A survey of best  
576 practices for RNA-seq data analysis, *Genome Biol.* 17 (2016) 1–19.  
577 <https://doi.org/10.1186/s13059-016-0881-8>.

- 578 [11] S. Müller, S.J. Liu, E. Di Lullo, M. Malatesta, A.A. Pollen, T.J. Nowakowski, G.  
579 Kohanbash, M. Aghi, A.R. Kriegstein, D.A. Lim, A. Diaz, Single-cell sequencing  
580 maps gene expression to mutational phylogenies in PDGF- and EGF-driven gliomas  
581, *Mol. Syst. Biol.* 12 (2016) 889. <https://doi.org/10.15252/msb.20166969>.
- 582 [12] D.T. Miyamoto, Y. Zheng, B.S. Wittner, R.J. Lee, H. Zhu, K.T. Broderick, R. Desai,  
583 D.B. Fox, B.W. Brannigan, J. Trautwein, K.S. Arora, N. Desai, D.M. Dahl, L. V.  
584 Sequist, M.R. Smith, R. Kapur, C.L. Wu, T. Shioda, S. Ramaswamy, D.T. Ting, M.  
585 Toner, S. Maheswaran, D.A. Haber, RNA-Seq of single prostate CTCs implicates  
586 noncanonical Wnt signaling in antiandrogen resistance, *Science* (80-. ). 349 (2015)  
587 1351–1356. <https://doi.org/10.1126/science.aab0917>.
- 588 [13] M.D. Luecken, F.J. Theis, Current best practices in single-cell RNA-seq analysis: a  
589 tutorial, *Mol. Syst. Biol.* 15 (2019). <https://doi.org/10.15252/msb.20188746>.
- 590 [14] A. Haque, J. Engel, S.A. Teichmann, T. Lönnerberg, A practical guide to single-cell  
591 RNA-sequencing for biomedical research and clinical applications, *Genome Med.* 9  
592 (2017) 1–12. <https://doi.org/10.1186/s13073-017-0467-4>.
- 593 [15] J. Schwender, C. König, M. Klapperstück, N. Heinzl, E. Munz, I. Hebbelmann, J.O.  
594 Hay, P. Denolf, S. De Bodt, H. Redestig, E. Caestecker, P.M. Jakob, H. Rolletschek,  
595 Transcript abundance on its own cannot be used to infer fluxes in central metabolism,  
596 *Front. Plant Sci.* 5 (2014) 1–16. <https://doi.org/10.3389/fpls.2014.00668>.
- 597 [16] O.E. Petrova, F. Garcia-Alcalde, C. Zampaloni, K. Sauer, Comparative evaluation of  
598 rRNA depletion procedures for the improved analysis of bacterial biofilm and mixed  
599 pathogen culture transcriptomes, *Sci. Rep.* 7 (2017) 1–15.  
600 <https://doi.org/10.1038/srep41114>.
- 601 [17] S.C. Taylor, G. Laperriere, H. Germain, Droplet Digital PCR versus qPCR for gene  
602 expression analysis with low abundant targets: From variable nonsense to publication  
603 quality data, *Sci. Rep.* 7 (2017) 1–8. <https://doi.org/10.1038/s41598-017-02217-x>.
- 604 [18] N.O. Fortunel, H.H. Otu, H.-H. Ng, J. Chen, X. Mu, T. Chevassut, X. Li, M. Joseph, C.  
605 Bailey, J.A. Hatzfeld, A. Hatzfeld, F. Usta, V.B. Vega, P.M. Long, T.A. Libermann, B.  
606 Lim, Comment on “ ‘Stemness’: Transcriptional Profiling of Embryonic and Adult  
607 Stem Cells” and “A Stem Cell Molecular Signature” (I), *Science* (80-. ). 302 (2003)  
608 393–393. <https://doi.org/10.1126/science.1086384>.
- 609 [19] B. Vieth, S. Parekh, C. Ziegenhain, W. Enard, I. Hellmann, A systematic evaluation of  
610 single cell RNA-seq analysis pipelines, *Nat. Commun.* 10 (2019) 1–11.  
611 <https://doi.org/10.1038/s41467-019-12266-7>.
- 612 [20] L.A. Corchete, E.A. Rojas, D. Alonso-López, J. De Las Rivas, N.C. Gutiérrez, F.J.  
613 Burguillo, Systematic comparison and assessment of RNA-seq procedures for gene  
614 expression quantitative analysis, *Sci. Rep.* 10 (2020) 1–15.  
615 <https://doi.org/10.1038/s41598-020-76881-x>.
- 616 [21] S. Picelli, Full-length single-cell RNA sequencing with smart-seq2, *Methods Mol.*  
617 *Biol.* 1979 (2019) 25–44. [https://doi.org/10.1007/978-1-4939-9240-9\\_3](https://doi.org/10.1007/978-1-4939-9240-9_3).
- 618 [22] S. Picelli, O.R. Faridani, Å.K. Björklund, G. Winberg, S. Sagasser, R. Sandberg, Full-  
619 length RNA-seq from single cells using Smart-seq2, *Nat. Protoc.* 9 (2014) 171–181.  
620 <https://doi.org/10.1038/nprot.2014.006>.
- 621 [23] X. Wang, Y. He, Q. Zhang, X. Ren, Z. Zhang, Direct Comparative Analyses of 10X



- 622 Genomics Chromium and Smart-seq2, *Genomics, Proteomics Bioinforma.* 19 (2021)  
623 253–266. <https://doi.org/10.1016/j.gpb.2020.02.005>.
- 624 [24] G.X.Y. Zheng, J.M. Terry, P. Belgrader, P. Ryvkin, Z.W. Bent, R. Wilson, S.B.  
625 Ziraldo, T.D. Wheeler, G.P. McDermott, J. Zhu, M.T. Gregory, J. Shuga, L.  
626 Montesclaros, J.G. Underwood, D.A. Masquelier, S.Y. Nishimura, M. Schnall-Levin,  
627 P.W. Wyatt, C.M. Hindson, R. Bharadwaj, A. Wong, K.D. Ness, L.W. Beppu, H.J.  
628 Deeg, C. McFarland, K.R. Loeb, W.J. Valente, N.G. Ericson, E.A. Stevens, J.P.  
629 Radich, T.S. Mikkelsen, B.J. Hindson, J.H. Bielas, Massively parallel digital  
630 transcriptional profiling of single cells, *Nat. Commun.* 8 (2017).  
631 <https://doi.org/10.1038/ncomms14049>.
- 632 [25] D. Zucha, M. Kubista, L. Valihrach, Tutorial: Guidelines for Single-Cell RT-qPCR,  
633 *Cells.* 10 (2021) 2607. <https://doi.org/10.3390/cells10102607>.
- 634 [26] M. Bengtsson, M. Hemberg, P. Rorsman, A. Ståhlberg, Quantification of mRNA in  
635 single cells and modelling of RT-qPCR induced noise, *BMC Mol. Biol.* 9 (2008) 1–11.  
636 <https://doi.org/10.1186/1471-2199-9-63>.
- 637 [27] S. Darmanis, C.J. Gallant, V.D. Marinescu, M. Niklasson, A. Segerman, G.  
638 Flamourakis, S. Fredriksson, E. Assarsson, M. Lundberg, S. Nelander, B. Westermark,  
639 U. Landegren, Simultaneous Multiplexed Measurement of RNA and Proteins in Single  
640 Cells, *Cell Rep.* 14 (2016) 380–389. <https://doi.org/10.1016/j.celrep.2015.12.021>.
- 641 [28] C. Brion, S.M. Lutz, F.W. Albert, Simultaneous quantification of mRNA and protein in  
642 single cells reveals post-transcriptional effects of genetic variation, *Elife.* 9 (2020) 1–  
643 34. <https://doi.org/10.7554/eLife.60645>.
- 644 [29] I. Kays, B.E. Chen, Protein and RNA quantification of multiple genes in single cells,  
645 *Biotechniques.* 66 (2019) 15–21. <https://doi.org/10.2144/btn-2018-0130>.
- 646 [30] E. Jonasson, L. Andersson, S. Dolatabadi, S. Ghannoum, P. Åman, A. Ståhlberg, Total  
647 mRNA Quantification in Single Cells: Sarcoma Cell Heterogeneity, *Cells.* 9 (2020).  
648 <https://doi.org/10.3390/cells9030759>.
- 649 [31] C. Albayrak, C.A. Jordi, C. Zechner, J. Lin, C.A. Bichsel, M. Khammash, S. Tay,  
650 Digital Quantification of Proteins and mRNA in Single Mammalian Cells, *Mol. Cell.*  
651 61 (2016) 914–924. <https://doi.org/10.1016/j.molcel.2016.02.030>.
- 652 [32] J. Lin, C. Jordi, M. Son, H. Van Phan, N. Drayman, M.F. Abasiyanik, L. Vistain, H.L.  
653 Tu, S. Tay, Ultra-sensitive digital quantification of proteins and mRNA in single cells,  
654 *Nat. Commun.* 10 (2019) 1–10. <https://doi.org/10.1038/s41467-019-11531-z>.
- 655 [33] J. Ma, G. Tran, A.M.D. Wan, E.W.K. Young, E. Kumacheva, N.N. Iscove, P.W.  
656 Zandstra, Microdroplet-based one-step RT-PCR for ultrahigh throughput single-cell  
657 multiplex gene expression analysis and rare cell detection, *Sci. Rep.* 11 (2021) 1–18.  
658 <https://doi.org/10.1038/s41598-021-86087-4>.
- 659 [34] A. Gross, J. Schoendube, S. Zimmermann, M. Steeb, R. Zengerle, P. Koltay,  
660 Technologies for Single-Cell Isolation, *Int. J. Mol. Sci.* 16 (2015) 16897–16919.  
661 <https://doi.org/10.3390/ijms160816897>.
- 662 [35] J. Riba, S. Zimmermann, P. Koltay, Technologies for Automated Single Cell Isolation,  
663 *Handb. Single Cell Technol.* (2018) 1–28. [https://doi.org/10.1007/978-981-10-4857-9\\_9-1](https://doi.org/10.1007/978-981-10-4857-9_9-1).  
664

- 665 [36] A.S. Basu, Digital Assays Part I: Partitioning Statistics and Digital PCR, *SLAS*  
666 *Technol.* 22 (2017) 369–386. <https://doi.org/10.1177/2472630317705680>.
- 667 [37] M. Alikian, A.S. Whale, S. Akiki, K. Piechocki, C. Torrado, T. Myint, S. Cowen, M.  
668 Griffiths, A.G. Reid, J. Apperley, H. White, J.F. Huggett, L. Foroni, RT-qPCR and RT-  
669 digital PCR: A comparison of different platforms for the evaluation of residual disease  
670 in chronic myeloid leukemia, *Clin. Chem.* 63 (2017) 525–531.  
671 <https://doi.org/10.1373/clinchem.2016.262824>.
- 672 [38] A. Gross, J. Schöndube, S. Niekrawitz, W. Streule, L. Riegger, R. Zengerle, P. Koltay,  
673 Single-Cell Printer: Automated, On Demand, and Label Free, *J. Lab. Autom.* 18 (2013)  
674 504–518. <https://doi.org/10.1177/2211068213497204>.
- 675 [39] F.C. Durst, A. Grujovic, I. Ganser, M. Hoffmann, P. Ugocsai, C.A. Klein, Z.T. Czyż,  
676 Targeted transcript quantification in single disseminated cancer cells after whole  
677 transcriptome amplification, *PLoS One.* 14 (2019) 1–21.  
678 <https://doi.org/10.1371/journal.pone.0216442>.
- 679 [40] J. Cui, K. Germer, T. Wu, J. Wang, J. Luo, S. Wang, Q. Wang, X. Zhang, Cross-talk  
680 between HER2 and MED1 Regulates Tamoxifen Resistance of Human Breast Cancer  
681 Cells, *Cancer Res.* 72 (2012) 5625–5634. <https://doi.org/10.1158/0008-5472.CAN-12-1305>.
- 683 [41] K. Subik, J.F. Lee, L. Baxter, T. Strzepak, D. Costello, P. Crowley, L. Xing, M.C.  
684 Hung, T. Bonfiglio, D.G. Hicks, P. Tang, The expression patterns of ER, PR, HER2,  
685 CK5/6, EGFR, KI-67 and AR by immunohistochemical analysis in breast cancer cell  
686 lines, *Breast Cancer Basic Clin. Res.* 4 (2010) 35–41.  
687 <https://doi.org/10.1177/117822341000400004>.
- 688 [42] A. Traube, T. Brode, Vorrichtung zur Aufnahme einer Flüssigkeit sowie Vorrichtung  
689 zur Aufbringung von Flüssigkeiten auf Probenträger und Verfahren hierzu,  
690 DE102007041071, 2010.
- 691 [43] M. Klinger, C. Laske, M. Graeve, M. Thoma, A. Traube, A Sensor for the In-Flight  
692 Detection of Single Fluorescent Microbodies in Nanoliter Droplets, *IEEE Sens. J.* 20  
693 (2020) 5809–5817. <https://doi.org/10.1109/JSEN.2020.2972268>.
- 694 [44] T. Groß, C. Jeney, D. Halm, G. Finkenzeller, G.B. Stark, R. Zengerle, P. Koltay, S.  
695 Zimmermann, Characterization of CRISPR/Cas9 RANKL knockout mesenchymal  
696 stem cell clones based on single-cell printing technology and emulsion coupling assay  
697 as a low-cellularity workflow for single-cell cloning, *BioRxiv.* (2020) 1–19.  
698 <https://doi.org/10.1101/2020.08.17.253559>.
- 699 [45] J. Riba, N. Renz, C. Niemöller, S. Bleul, D. Pfeifer, J.M. Stosch, K.H. Metzeler, B.  
700 Hackanson, M. Lübbert, J. Duyster, P. Koltay, R. Zengerle, R. Claus, S. Zimmermann,  
701 H. Becker, Molecular genetic characterization of individual cancer cells isolated via  
702 single-cell printing, *PLoS One.* 11 (2016) 1–15.  
703 <https://doi.org/10.1371/journal.pone.0163455>.
- 704 [46] J. Madic, A. Zocevic, V. Senlis, E. Fradet, B. Andre, S. Muller, R. Dangla, M.E.  
705 Droniou, Three-color crystal digital PCR, *Biomol. Detect. Quantif.* 10 (2016) 34–46.  
706 <https://doi.org/10.1016/j.bdq.2016.10.002>.
- 707 [47] A.S. Whale, W. De Spiegelaere, W. Trypsteen, A.A. Nour, Y.-K. Bae, V. Benes, D.  
708 Burke, M. Cleveland, P. Corbisier, A.S. Devonshire, L. Dong, D. Drandi, C.A. Foy,

- 709 J.A. Garson, H.-J. He, J. Hellemans, M. Kubista, A. Lievens, M.G. Makrigiorgos, M.  
710 Milavec, R.D. Mueller, T. Nolan, D.M. O’Sullivan, M.W. Pfaffl, S. Rödiger, E.L.  
711 Romsos, G.L. Shipley, V. Taly, A. Untergasser, C.T. Wittwer, S.A. Bustin, J.  
712 Vandesompele, J.F. Huggett, The Digital MIQE Guidelines Update: Minimum  
713 Information for Publication of Quantitative Digital PCR Experiments for 2020, *Clin.*  
714 *Chem.* 66 (2020) 1012–1029. <https://doi.org/10.1093/clinchem/hvaa125>.
- 715 [48] J.F. Huggett, C.A. Foy, V. Benes, K. Emslie, J.A. Garson, R. Haynes, J. Hellemans, M.  
716 Kubista, R.D. Mueller, T. Nolan, M.W. Pfaffl, G.L. Shipley, J. Vandesompele, C.T.  
717 Wittwer, S.A. Bustin, The digital MIQE guidelines: Minimum information for  
718 publication of quantitative digital PCR experiments, *Clin. Chem.* 59 (2013) 892–902.  
719 <https://doi.org/10.1373/clinchem.2013.206375>.
- 720 [49] R. Patro, G. Duggal, M.I. Love, R.A. Irizarry, C. Kingsford, Salmon provides fast and  
721 bias-aware quantification of transcript expression, *Nat. Methods.* 14 (2017) 417–419.  
722 <https://doi.org/10.1038/nmeth.4197>.
- 723 [50] N.L. Bray, H. Pimentel, P. Melsted, L. Pachter, Near-optimal probabilistic RNA-seq  
724 quantification, *Nat. Biotechnol.* 34 (2016) 525–527. <https://doi.org/10.1038/nbt.3519>.
- 725 [51] A. Dobin, C.A. Davis, F. Schlesinger, J. Drenkow, C. Zaleski, S. Jha, P. Batut, M.  
726 Chaisson, T.R. Gingeras, STAR: Ultrafast universal RNA-seq aligner, *Bioinformatics.*  
727 29 (2013) 15–21. <https://doi.org/10.1093/bioinformatics/bts635>.
- 728 [52] T. Kluyver, B. Ragan-Kelley, F. Pérez, B. Granger, M. Bussonnier, J. Frederic, K.  
729 Kelley, J. Hamrick, J. Grout, S. Corlay, P. Ivanov, D. Avila, S. Abdalla, C. Willing,  
730 Jupyter Notebooks—a publishing format for reproducible computational workflows,  
731 *Position. Power Acad. Publ. Play. Agents Agendas - Proc. 20th Int. Conf. Electron.*  
732 *Publ. ELPUB 2016.* (2016) 87–90. <https://doi.org/10.3233/978-1-61499-649-1-87>.
- 733 [53] M.I. Love, C. Sonesson, P.F. Hickey, L.K. Johnson, N. Tessa Pierce, L. Shepherd, M.  
734 Morgan, R. Patro, Tximeta: Reference sequence checksums for provenance  
735 identification in RNA-seq, *PLoS Comput. Biol.* 16 (2020) 1–13.  
736 <https://doi.org/10.1371/journal.pcbi.1007664>.
- 737 [54] C. Sonesson, M.I. Love, M.D. Robinson, Differential analyses for RNA-seq: Transcript-  
738 level estimates improve gene-level inferences, *F1000Research.* 4 (2016) 1–23.  
739 <https://doi.org/10.12688/F1000RESEARCH.7563.2>.
- 740 [55] Y. Liao, G.K. Smyth, W. Shi, FeatureCounts: An efficient general purpose program for  
741 assigning sequence reads to genomic features, *Bioinformatics.* 30 (2014) 923–930.  
742 <https://doi.org/10.1093/bioinformatics/btt656>.
- 743 [56] M.I. Love, W. Huber, S. Anders, Moderated estimation of fold change and dispersion  
744 for RNA-seq data with DESeq2, *Genome Biol.* 15 (2014) 1–21.  
745 <https://doi.org/10.1186/s13059-014-0550-8>.
- 746 [57] F.A. Wolf, P. Angerer, F.J. Theis, SCANPY: large-scale single-cell gene expression  
747 data analysis, *Genome Biol.* 19 (2018) 15. <https://doi.org/10.1186/s13059-017-1382-0>.
- 748 [58] K. Polański, M.D. Young, Z. Miao, K.B. Meyer, S.A. Teichmann, J.E. Park, BBKNN:  
749 Fast batch alignment of single cell transcriptomes, *Bioinformatics.* 36 (2020) 964–965.  
750 <https://doi.org/10.1093/bioinformatics/btz625>.
- 751 [59] S. Mora-Castilla, C. To, S. Vaezeslami, R. Morey, S. Srinivasan, J.N. Dumdie, H.  
752 Cook-Andersen, J. Jenkins, L.C. Laurent, Miniaturization Technologies for Efficient

- 753 Single-Cell Library Preparation for Next-Generation Sequencing, *J. Lab. Autom.* 21  
754 (2016) 557–567. <https://doi.org/10.1177/2211068216630741>.
- 755 [60] V. Hahaut, D. Pavlinic, W. Carbone, S. Schuierer, P. Balmer, M. Quinodoz, M.  
756 Renner, G. Roma, C.S. Cowan, S. Picelli, Fast and highly sensitive full-length single-  
757 cell RNA sequencing using FLASH-seq, *Nat. Biotechnol.* 40 (2022).  
758 <https://doi.org/10.1038/s41587-022-01312-3>.
- 759 [61] M. Hagemann-Jensen, C. Ziegenhain, R. Sandberg, Scalable single-cell RNA  
760 sequencing from full transcripts with Smart-seq3xpress, *Nat. Biotechnol.* 40 (2022).  
761 <https://doi.org/10.1038/s41587-022-01311-4>.
- 762 [62] B.N. Jaeger, E. Yángüez, L. Gesuita, A. Denoth-Lippuner, M. Kruse, T. Karayannis, S.  
763 Jessberger, Miniaturization of Smart-seq2 for Single-Cell and Single-Nucleus RNA  
764 Sequencing, *STAR Protoc.* 1 (2020). <https://doi.org/10.1016/j.xpro.2020.100081>.
- 765 [63] I. Smyrlaki, M. Ekman, A. Lentini, N. Rufino de Sousa, N. Papanicolaou, M.  
766 Vondracek, J. Aarum, H. Safari, S. Muradrasoli, A.G. Rothfuchs, J. Albert, B.  
767 Högberg, B. Reinius, Massive and rapid COVID-19 testing is feasible by extraction-  
768 free SARS-CoV-2 RT-PCR, *Nat. Commun.* 11 (2020) 1–12.  
769 <https://doi.org/10.1038/s41467-020-18611-5>.
- 770 [64] B. Kozera, M. Rapacz, Reference genes in real-time PCR, *J. Appl. Genet.* 54 (2013)  
771 391–406. <https://doi.org/10.1007/s13353-013-0173-x>.
- 772 [65] L. Zhang, S. Zhang, Comparison of Computational Methods for Imputing Single-Cell  
773 RNA-Sequencing Data, *IEEE/ACM Trans. Comput. Biol. Bioinforma.* 17 (2020) 376–  
774 389. <https://doi.org/10.1109/TCBB.2018.2848633>.
- 775 [66] F. Schuler, M. Trotter, R. Zengerle, F. Von Stetten, Monochrome Multiplexing in  
776 Polymerase Chain Reaction by Photobleaching of Fluorogenic Hydrolysis Probes,  
777 *Anal. Chem.* 88 (2016) 2590–2595. <https://doi.org/10.1021/acs.analchem.5b02960>.
- 778 [67] F. Schlenker, E. Kipf, N. Borst, T. Hutzenlaub, R. Zengerle, F. Von Stetten, P. Juelg,  
779 Virtual Fluorescence Color Channels by Selective Photobleaching in Digital PCR  
780 Applied to the Quantification of KRAS Point Mutations, *Anal. Chem.* 93 (2021)  
781 10538–10545. <https://doi.org/10.1021/acs.analchem.1c01488>.
- 782 [68] A. Ståhlberg, J. Håkansson, X. Xian, H. Semb, M. Kubista, Properties of the Reverse  
783 Transcription Reaction in mRNA Quantification, *Clin. Chem.* 50 (2004) 509–515.  
784 <https://doi.org/10.1373/clinchem.2003.026161>.
- 785 [69] A.P. Rajkumar, P. Qvist, R. Lazarus, F. Lescai, J. Ju, M. Nyegaard, O. Mors, A.D.  
786 Børglum, Q. Li, J.H. Christensen, Experimental validation of methods for differential  
787 gene expression analysis and sample pooling in RNA-seq, *BMC Genomics.* 16 (2015)  
788 1–8. <https://doi.org/10.1186/s12864-015-1767-y>.
- 789 [70] C. Everaert, M. Luypaert, J.L.V. Maag, Q.X. Cheng, M.E. Dinger, J. Hellemans, P.  
790 Mestdagh, Benchmarking of RNA-sequencing analysis workflows using whole-  
791 transcriptome RT-qPCR expression data, *Sci. Rep.* 7 (2017) 1–11.  
792 <https://doi.org/10.1038/s41598-017-01617-3>.
- 793 [71] S. von der Heyde, S. Wagner, A. Czerny, M. Nietert, F. Ludewig, G. Salinas-Riester,  
794 D. Arlt, T. Reißbarth, mRNA profiling reveals determinants of trastuzumab efficiency  
795 in HER2-positive breast cancer, *PLoS One.* 10 (2015) 1–27.  
796 <https://doi.org/10.1371/journal.pone.0117818>.

- 797 [72] F. Stumpf, J. Schoendube, A. Gross, C. Rath, S. Niekrawietz, P. Koltay, G. Roth,  
798 Single-cell PCR of genomic DNA enabled by automated single-cell printing for cell  
799 isolation, *Biosens. Bioelectron.* 69 (2015) 301–306.  
800 <https://doi.org/10.1016/j.bios.2015.03.008>.
- 801 [73] M. Hagemann-Jensen, C. Ziegenhain, P. Chen, D. Ramsköld, G.J. Hendriks, A.J.M.  
802 Larsson, O.R. Faridani, R. Sandberg, Single-cell RNA counting at allele and isoform  
803 resolution using Smart-seq3, *Nat. Biotechnol.* 38 (2020) 708–714.  
804 <https://doi.org/10.1038/s41587-020-0497-0>.
- 805
- 806

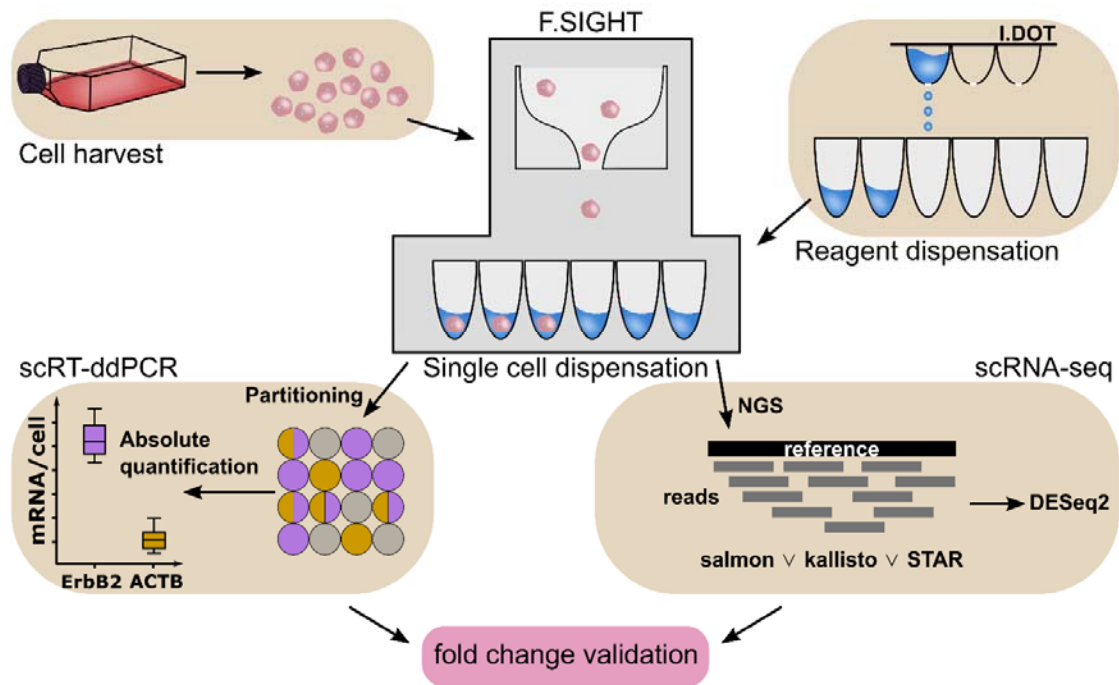

807

808 **Graphical abstract: Validation of scRNA-seq fold changes by scRT-ddPCR.**

809

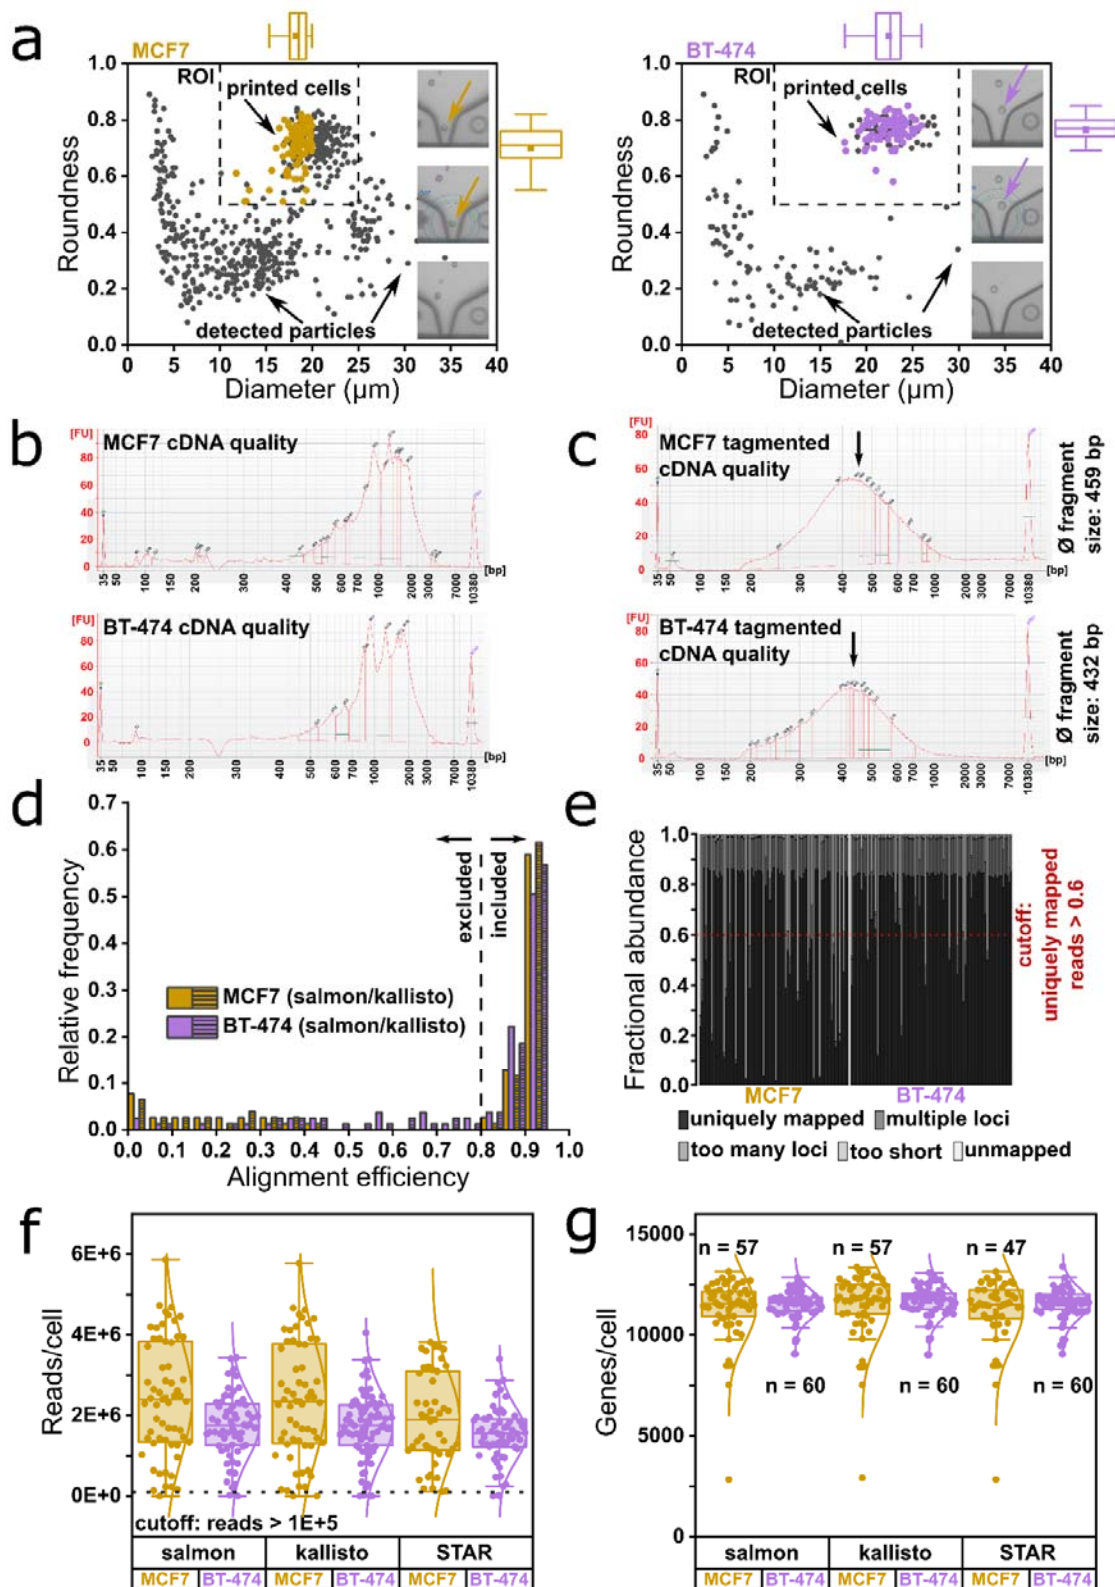

810

811 **Figure 1: Quality control of down-scaled SMART-Seq® workflow with MCF7 and BT-474 cells. a)**  
 812 2D-scatter plots (roundness vs. diameter) of detected particles in the dispensation nozzle during the process and  
 813 dispensed cells (colored dots). The particles can be of various origins: cell debris, cell aggregates, corpuscular  
 814 materials from the cell culture medium or cells. The ROI (region of interest) depicts the desired morphological

815 criteria by which a particle is defined as a cell. The overlap in the ROI between detected particles and dispensed  
816 cells is because of the fact that some cells could not be isolated. Boxplots show roundness and diameter  
817 distributions of dispensed single cells (n = 84). Representative images of the printing process, which enable  
818 manual image-based exclusion of droplets with multiple cells or empty droplets are shown. These images can be  
819 unambiguously assigned to the addressed wells of the microplate. **b, c)** Representative electropherograms  
820 (Agilent's Bioanalyzer) of cDNA and tagmented cDNA size distributions for both cell lines. The average cDNA  
821 length after tagmentation was 459 bp for MCF7 and 432 bp for BT-474 cells. **d)** Alignment efficiency of salmon  
822 and kallisto aligner. Cells with less than 80 % alignment efficiency were excluded from further analyses. **e)**  
823 Alignment statistics (fraction of uniquely mapped reads, fraction of reads mapped to multiple loci, fraction of  
824 reads mapped to too many loci, fraction of reads too short for mapping, fraction of unmapped reads) for MCF7  
825 and BT-474 cells using STAR aligner. Cells with less than 60 % of uniquely mapped reads were excluded from  
826 further analyses. **f)** Total read counts per cell for MCF7 and BT-474 cells using salmon, kallisto or STAR  
827 aligner. Cells with less than 1E+5 transcripts were excluded from further analyses. **g)** Gene per cell counts for  
828 MCF7 cells (median across all aligners: 11676 genes per cell) and BT-474 cells (median across all aligners:  
829 11682 genes per cell) after all steps of filtering. The median of genes per cell is the same independent of aligner  
830 and cell line ( $p > 0.05$ , Mann-Whitney test with Bonferroni correction). The amount of cells excluded after each  
831 filtering step is shown in **Tab S1**.  
832



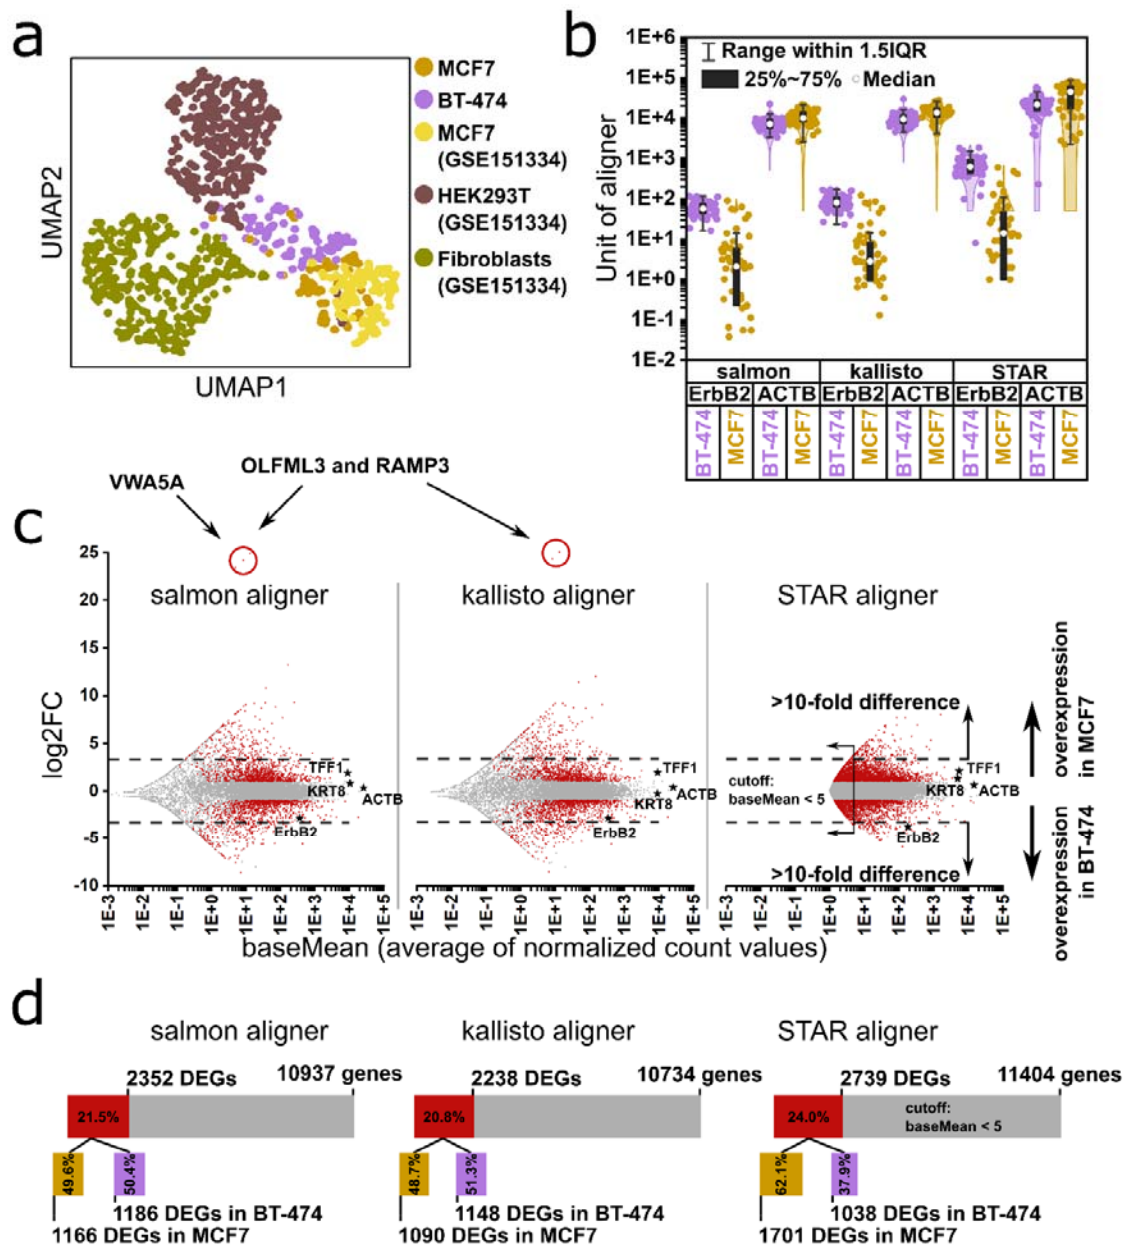

833

834 **Figure 2: Validation of down-scaled Smart-seq2 by clustering and different bioinformatics pipelines. a)**  
 835 UMAP clustering of MCF7 and BT-474 cells along with MCF7 cells, HEK293T cells and fibroblasts from  
 836 GSE151334. **b)** Violin plots of *ErbB2* and *ACTB* expression values in MCF7 and BT-474 cells from salmon,  
 837 kallisto and STAR aligner in the respective units (salmon and kallisto: TPM: transcripts per kilobase million;  
 838 STAR: raw counts). **c)** Bland-Altman plots of gene expression in MCF7 over BT-474 cells with salmon, kallisto  
 839 or STAR aligner input to DESeq2. Each dot symbolizes a gene with its average expression value in both cell  
 840 lines (baseMean; x-axis) and the log<sub>2</sub>FC (log<sub>2</sub> of fold change; y-axis). Dots colored in red are significantly  
 841 differentially expressed genes (DEGs); log<sub>2</sub>FC > 1 and p<sub>adj</sub> < 0.05: overexpression in MCF7 cells; log<sub>2</sub>FC < -1  
 842 and p<sub>adj</sub> < 0.05: overexpression in BT-474 cells. *ErbB2*, *ACTB*, *TFF1* and *KRT8* expression values are  
 843 highlighted with stars and extreme values are highlighted with a red circle. The dashed line indicates 10-fold  
 844 overexpression in either cell line. **d)** Total number of genes analyzed by DESeq2 using salmon, kallisto or STAR  
 845 aligner input (STAR: baseMean > 5 necessary for consideration) with amount of DEGs overexpressed in either  
 846 cell line.

847

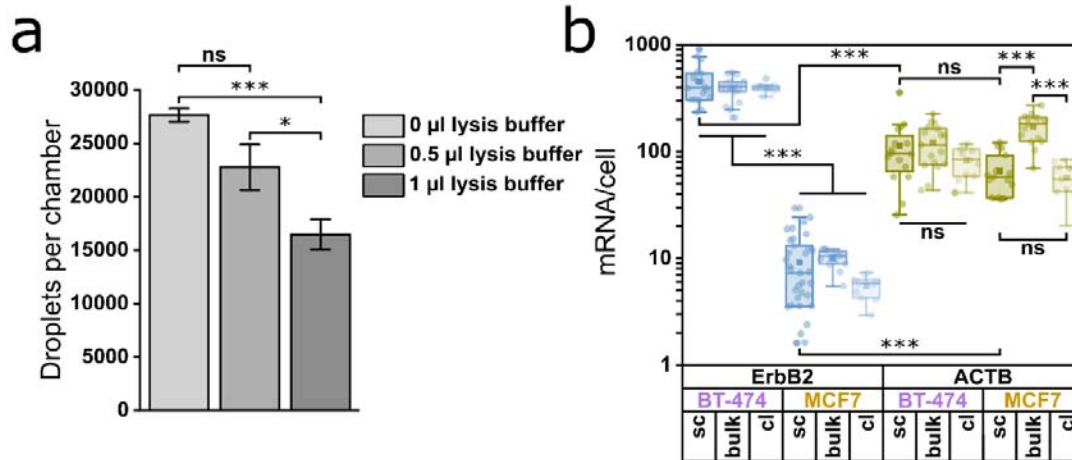

848

849 **Figure 3: Validation of scRT-ddPCR workflow.** a) Impact of lysis buffer volume on the number of droplets  
 850 generated per reaction chamber of one Sapphire Chip. Bar plots show mean values with standard deviation as  
 851 error bars. Groups were compared using student's t-test with Bonferroni correction ( $n = 3$ ). b) Absolute gene  
 852 mRNA per cell counts from different methods ('sc' = scRT-ddPCR; 'bulk' = quantification from bulk isolated  
 853 RNA; 'cl' = quantification from a crude lysate) according to the genes *ErbB2* and *ACTB* and the cell lines BT-  
 854 474 and MCF7. Groups were compared using Mann-Whitney test with Bonferroni correction ( $n \geq 11$ ).  
 855 Significance levels not indicated are non-relevant comparisons for this work.

856

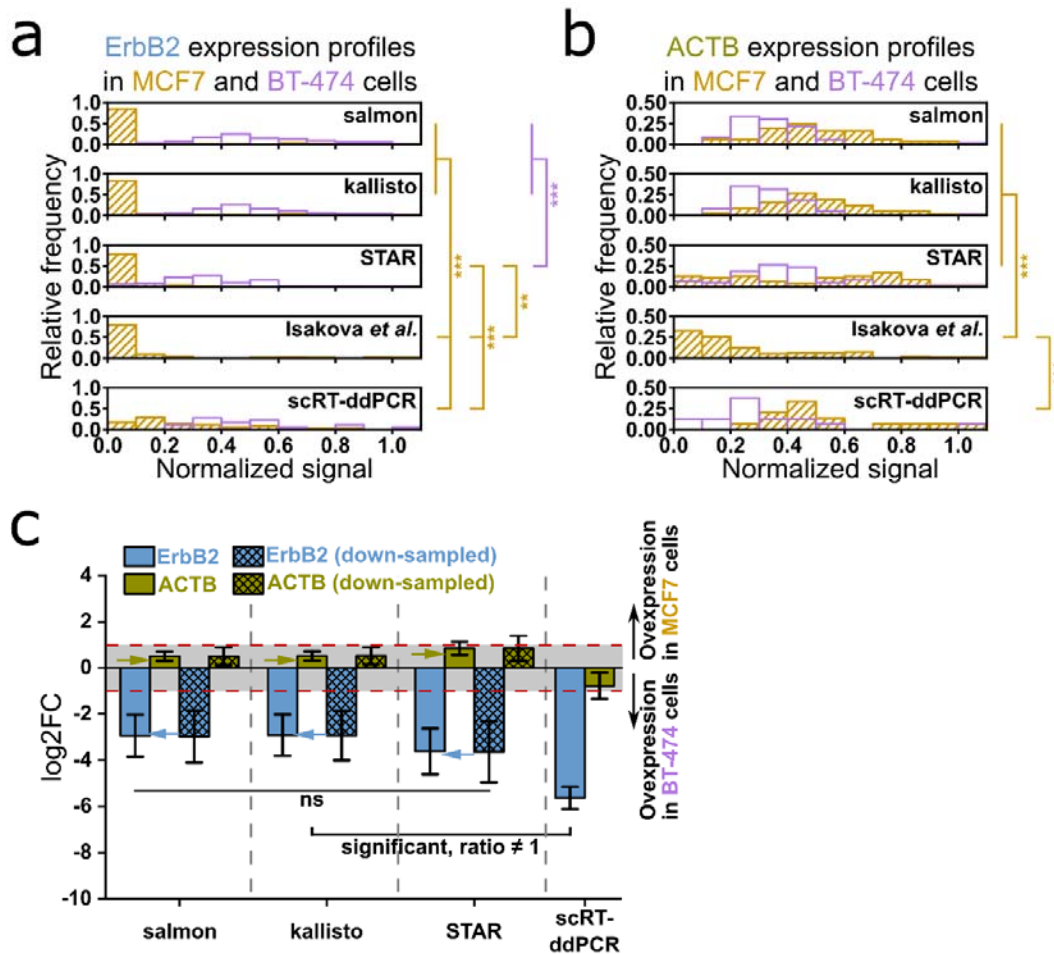

857

858 **Figure 4: Comparison of scRT-ddPCR and scRNA-seq on the basis of signal distributions and fold**  
 859 **changes. a)** Distribution of normalized *ErbB2* expression signal (normalized to maximum signal) from salmon,  
 860 kallisto and STAR aligner used in this study, MCF7 expression data from Isakova *et al.* (10-fold down-scaled  
 861 Smart-seq2) and scRT-ddPCR in MCF7 and BT-474 cells. All distributions were compared using a  
 862 Kolmogorov-Smirnov test with Bonferroni correction for multiple testing. Non-significant difference are not  
 863 shown. **b)** Distribution of normalized *ACTB* expression signal (normalized to maximum signal) from salmon,  
 864 kallisto and STAR aligner used in this study, MCF7 expression data from Isakova *et al.* (1/10 down-scaled  
 865 Smart-seq2) and scRT-ddPCR in MCF7 and BT-474 cells. All distributions were compared using a  
 866 Kolmogorov-Smirnov test with Bonferroni correction for multiple testing. Non-significant difference are not  
 867 shown. **c)** Log2FCs (MCF7 vs. BT-474) for scRNA-seq data processed with salmon, kallisto and STAR aligner  
 868 and scRT-ddPCR, calculated on the basis of expression values as shown in **Fig 2b**. The shaded bars show  
 869 log2FCs of the respective group down-sampled by bootstrapping to the same sample size of scRT-ddPCR.  
 870 Log2FCs were compared using a bootstrapping comparison (2.8 Bootstrapping comparison and **Fig S4**). Bars  
 871 depict mean log2FCs with bootstrapped error bars indicating 95 % CI. Log2FCs within  $0 \pm 1$  are not considered  
 872 to be statistically significant. Blue and green arrows indicate log2FCs calculated by DESeq2.

873

874
